# Supplementary material for: Association between cannabis use and treatment outcomes in patients receiving methadone maintenance treatment: a systematic review protocol
Source: Springer Nature journal article supplement (doi:10.1186/s13643-016-0317-2), 2016-08-16
Supplement: MOESM1 [file 13643_2016_317_MOESM1_ESM.pdf]

## **Data Extraction Form**

Study ID: \_\_\_\_\_ Reviewer Initials: \_\_\_\_\_

### **Publication Details**

Author (last name, first initial): \_\_\_\_\_ Year: \_\_\_\_\_

Title: \_\_\_\_\_

Journal: \_\_\_\_\_ Country: \_\_\_\_\_

### **Methods**

Study design: \_\_\_\_\_ Study setting: \_\_\_\_\_

Length of study: \_\_\_\_\_

Description of sample:

Exposure: \_\_\_\_\_ Intervention (if applicable): \_\_\_\_\_

### **Demographics**

Number of participants: Total: \_\_\_\_\_ Men: \_\_\_\_\_ Women: \_\_\_\_\_ Per group: \_\_\_\_\_

Mean age (SD): Total: \_\_\_\_\_ Men: \_\_\_\_\_ Women: \_\_\_\_\_

Per group: \_\_\_\_\_

Ethnicity:

### **Exposure measurements (cannabis). Circle one.**

Self-report      Urinalysis      Hair analysis      Other \_\_\_\_\_

Comments:

### **Outcome measurements:**

Illicit opioid use: \_\_\_\_\_

Treatment retention: \_\_\_\_\_

Criminal activity: \_\_\_\_\_

Jail time: \_\_\_\_\_

Polydrug use: \_\_\_\_\_

Injecting behaviours: \_\_\_\_\_

Comments:

### **Results**

Statistical methods: \_\_\_\_\_ Adjusted for: \_\_\_\_\_

Coefficient: \_\_\_\_\_ 95% CI: \_\_\_\_\_ p-value: \_\_\_\_\_

Findings: \_\_\_\_\_

Limitations: \_\_\_\_\_

**Inclusion Criteria**

Patients on methadone maintenance treatment

RCT or observational study design

Cannabis measured as a predictor variable

**Exclusion Criteria**

Patients on any other opioid substitution therapy

Methadone being used for purposes other than maintenance treatment (i.e. recreational or detoxification)

Cannabis measured as an outcome variable

Study does not measure a primary (illicit opioid use, treatment retention) or secondary (criminal activity, jail time, polydrug use, and injecting behaviours) outcome variables

**Additional Comments:**

---

---

---

---

---
